# Supplementary material
Source: MDPI journal article supplement (https://www.mdpi.com/2073-4395/11/5/921)
Supplement: s1 [file s1]

The following data are presented:

- Agronomy\_Amax\_Gsmax.png is an image of the relationship between the actual Amax and Gs max values from the field trial
- Agronomy\_Kinetics\_ANOVA\_Results\_0121.xlsx contains ANOVA outputs for slmax A, slmax gs, tau A, tau gs, Predicted Amax, Predicted gsmax, Actual Amax, Actual gs max, Actual WUE max from field trial step change kinetics data;
- Amax\_vs\_gamx\_Correl.xlsx contains ANOVA test of the linear model of actual not modelled Amax vs gsmax from field trial kinetics data;
- Stomata\_Size\_Density\_Models.xlsx contain ANOVAS of stomatal size, density and linear model of size vs density from field trial stomatal impression data;
- Agronomy\_Stomata\_LMER\_Results\_0221.xlsx contains ANOVAs of linear models of SD vs model Amax, SD vs model gmax, SD vs Actual amax, SD vs Actual gmax; SA vs tau A, SA vs tau gs, SA vs Sl max A, SA vs Sl max gs from field trial stomatal impressions and kinetics data;
- Combined\_Subset\_Outputs contains ANOVAs for biomass, tillers, ears, grains, TGW, grain mass, HI, and % non-fertile ears from field trial harvest data;
- Combined\_ACi\_Outputs.xlsx contains ANOVAs of Vcmax and Jmax from controlled environment trials;
- Combined\_AQ\_Outputs.xlsx contains ANOVAs of QE and Asat from controlled environment trials;
- A\_gs\_Correl.txt contains an ANOVA of the correlation between A and gs from A-Q measurements of controlled environment trials;
- Amax\_Jmax\_Vcmax\_lm.xlsx contains ANOVAs of the linear models of Amax vs Jmax and Amax vs Vcmax derived from A-Ci measurements in controlled environment trials
-
